# Supplementary material for: Past, Present, and Future of Japanese Encephalitis
Source: PubMed Central journal article supplement (PMC2660690; doi:10.3201/eid1501.080311), 2009-01
Supplement: 08-0311_Techapp-s1.pdf [file 08-0311_Techapp-s1.pdf]

# Past, Present, and Future of Japanese Encephalitis

## Technical Appendix

### Supplementary References 41–49

41. Parida M, Dash PK, Tripathi NK, Ambuj, Sannarangaiah S, Saxena P, et al. Japanese encephalitis outbreak, India, 2005. *Emerg Infect Dis.* 2006;12:1427–30. [Medline](#)
42. Jacobson J, Sivalenka S. Japanese encephalitis globally and in India. *Indian J Public Health.* 2004;48:49–56. [Medline](#)
43. Wu YC, Huang YS, Chien LJ, Lin TL, Yueh YY, Tseng WL, et al. The epidemiology of Japanese encephalitis on Taiwan during 1966–1997. *Am J Trop Med Hyg.* 1999;61:78–84. [Medline](#)
44. Tseng HF, Tan HF, Chang CK, Huang WL, Ho WC. Seroepidemiology study of Japanese encephalitis neutralizing antibodies in southern Taiwan: a comparative study between urban city and country townships. *Am J Infect Control.* 2003;31:435–40. [Medline](#) DOI: [10.1067/mic.2003.73](https://doi.org/10.1067/mic.2003.73)
45. Khasnis AA, Nettleman MD. Global warming and infectious disease. *Arch Med Res.* 2005;36:689–96. [Medline](#) DOI: [10.1016/j.arcmed.2005.03.041](https://doi.org/10.1016/j.arcmed.2005.03.041)
46. Hales S, de Wet N, Maindonald J, Woodward A. Potential effect of population and climate changes on global distribution of dengue fever: an empirical model. *Lancet.* 2002;360:830–4. [Medline](#) DOI: [10.1016/S0140-6736\(02\)09964-6](https://doi.org/10.1016/S0140-6736(02)09964-6)
47. Hsu SM, Yen AM, Chen TH. The impact of climate on Japanese encephalitis. *Epidemiol Infect.* 2008;136:980–7. [Medline](#) DOI: [10.1017/S0950268807009454](https://doi.org/10.1017/S0950268807009454)
48. Yasuoka J, Levins R. Ecology of vector mosquitoes in Sri Lanka—suggestions for future mosquito control in rice ecosystems. *Southeast Asian J Trop Med Public Health.* 2007;38:646–57. [Medline](#)
49. Peiris JS, Amerasinghe FP, Amerasinghe PH, Ratnayake CB, Karunaratne SH, Tsai TF. Japanese encephalitis in Sri Lanka—the study of an epidemic: vector incrimination, porcine infection and human disease. *Trans R Soc Trop Med Hyg.* 1992;86:307–13. [Medline](#) DOI: [10.1016/0035-9203\(92\)90325-7](https://doi.org/10.1016/0035-9203(92)90325-7)
